# Supplementary material for: PIF1 family DNA helicases suppress R-loop mediated genome instability at tRNA genes
Source: PubMed Central journal article supplement (PMC5413955; doi:10.1038/ncomms15025), 2017-04-21
Supplement: ncomms15025-s1.pdf [file ncomms15025-s1.pdf]

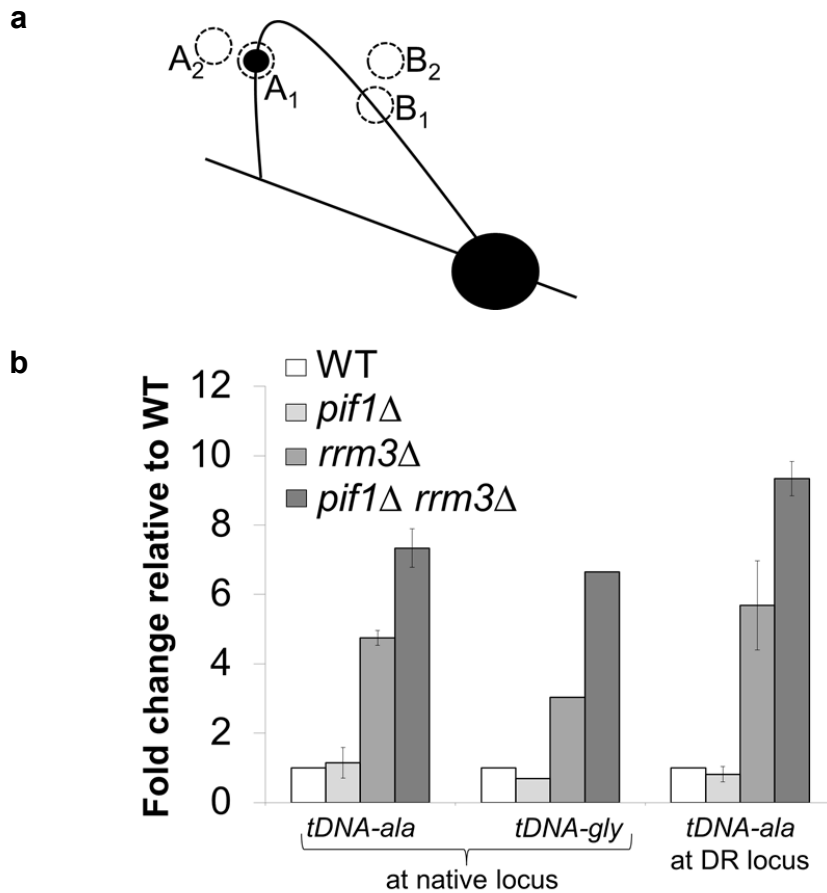

**Supplementary Figure 1: (a) Schematic of 2D gel quantification.** Pause signal for each strain was quantitated by measuring total pause signal (A1) relative to actively replicating molecules (B1) after removing background measured at A2 and B2, respectively,  $[(A1-A2)/(B1-B2)]$ . The fold change in pause intensity relative to WT was determined by  $[\text{mutant pause}/\text{WT pause}]$ . **(b) Fold increase of pausing relative to WT at endogenous  $tDNA^{ala}$ HO and  $tDNA^{gly}$ HO; and at  $tDNA^{ala}$ HO inserted at DR locus.** Quantification of pausing was normalized to WT to obtain fold increase relative to WT for each strain.  $tDNA^{gly}$  was done in one isolate. Error bars are  $\pm$  standard error (s.e.) of two independent isolates for  $tDNA^{ala}$  at native and DR locus.

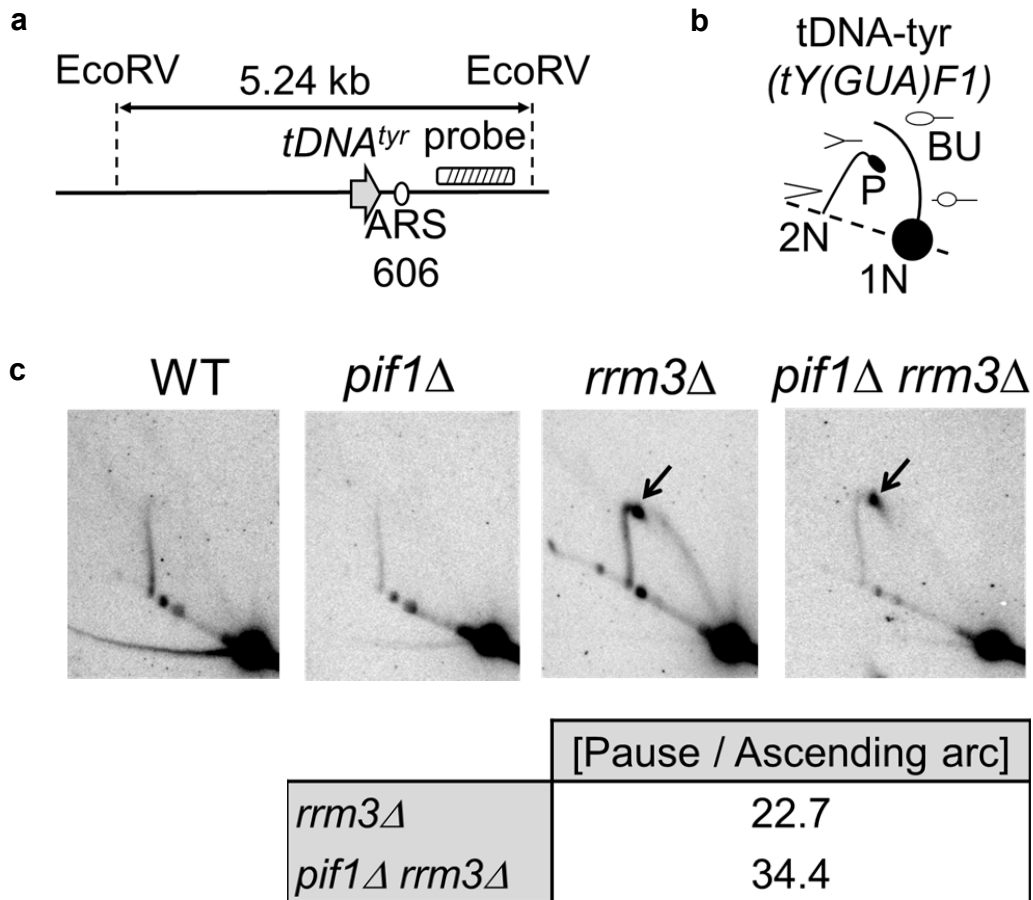

**Supplementary Figure 2: (a) Map of *tDNA<sup>tyr</sup>HO* at its endogenous locus.** DNA from each strain was digested with EcoRV, which generates a 5.2 kb DNA fragment containing *tDNA<sup>tyr</sup>HO*. Southern blots were probed using a <sup>32</sup>P labeled probe (dashed rectangle, see Supplementary Table 10 for primers). **(b) Schematic of *tDNA<sup>tyr</sup>HO* 2D gel.** *tDNA<sup>tyr</sup>HO* is located near ARS606. Therefore, in 2D gels of the EcoRV fragment, the pause (P) is located at the bubble (BU) to y-arc transition site. **(c) Southern blots of *tDNA<sup>tyr</sup>HO* at its native locus in indicated strains.** In 2D gels of *rrm3Δ* and *pif1Δ rrm3Δ* cells, fork pausing is indicated by the solid arrow. Southern blots of WT and *pif1Δ* were too faint to see pausing. **(d) Quantification of fork pausing in *tDNA<sup>tyr</sup>HO*.** Pausing in WT and *pif1Δ* cells was too faint to quantify. Therefore, pause intensity in *rrm3Δ* and *pif1Δ rrm3Δ* cells is displayed as the [Pause/Ascending arc] ratio. These data are consistent with those in Figure 2 and Supplementary Figure 4 where pausing is higher in *pif1Δ rrm3Δ* double mutant cells compared to *rrm3Δ* cells. Note that the exposure of the Southern for the double mutant is lower than that for the *rrm3Δ* DNA, as determined by intensity of the 1N spot. As a result, the pause at the tDNA in the double mutant appears lower than that for *rrm3Δ*.

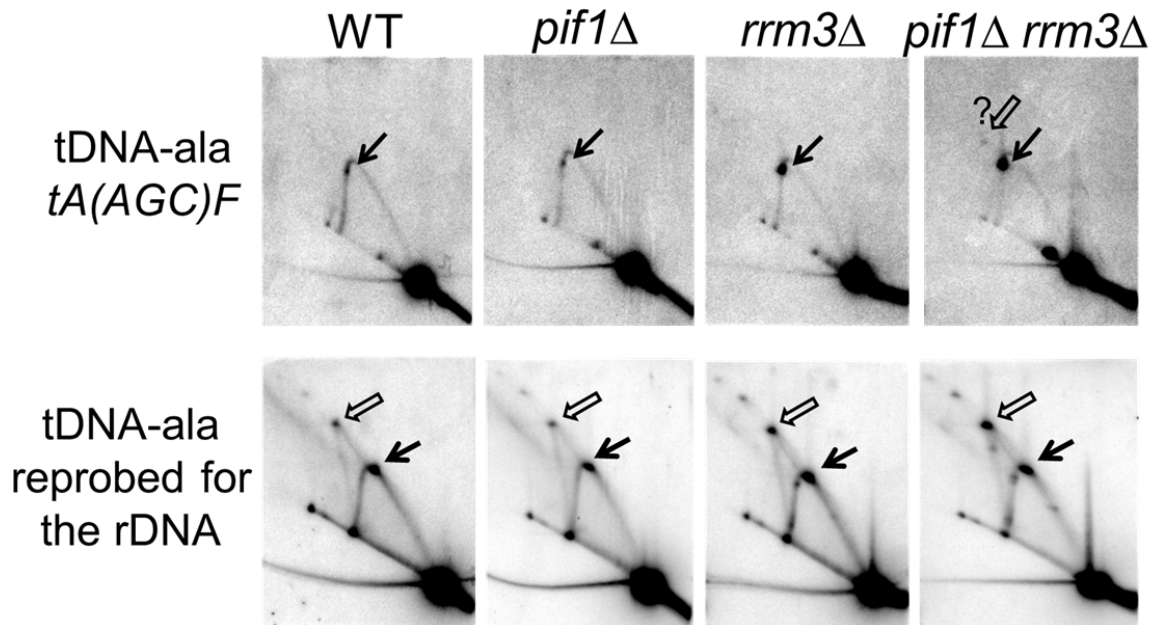

**Supplementary Figure 3: Southern blots of *tDNA*<sup>ala</sup>HO at its native locus (top) is reprobed for the rDNA at RFB locus (bottom).** DNA was digested with BglIII and Southern blots were probed for the fragment containing *tDNA*<sup>ala</sup>HO (top panel) and for the fragment of the rDNA that contains the RFB (bottom). See Supplementary Table 10 for probe specific primers. In the top right panel, the open arrow and adjacent question mark are at a position consistent with forks converging at tDNA-ala.

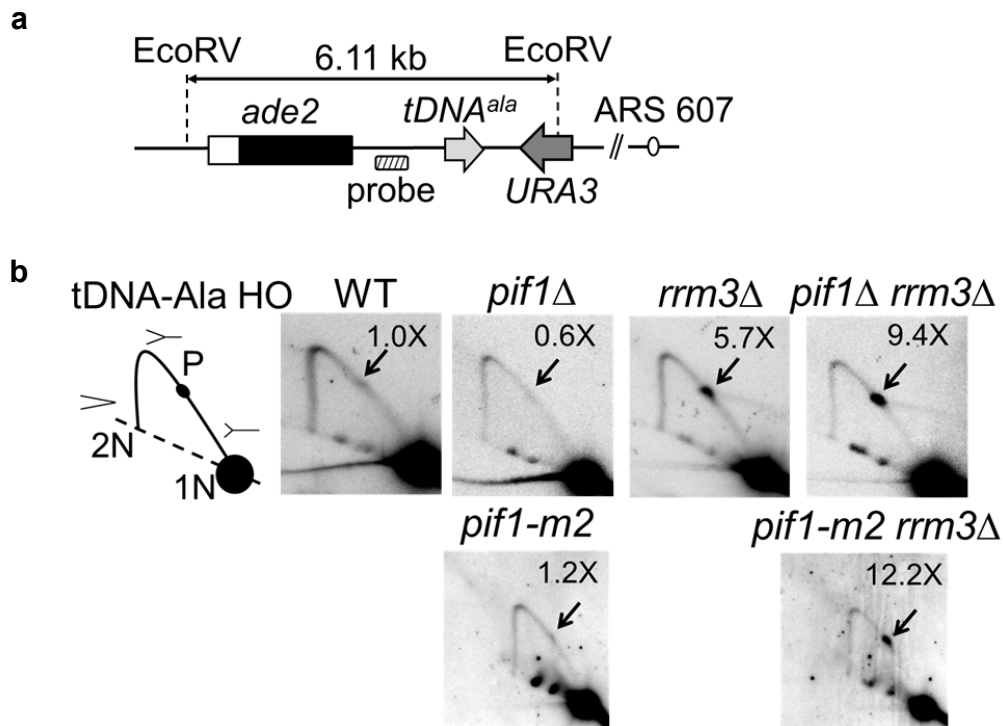

**Supplementary Figure 4: (a) Map of *tDNA<sup>ala</sup>*HO inserted at DR locus.** DNA from each strain was digested with EcoRV, which generates a 6.1 kb DNA fragment containing the tDNA. Southern blots were probed using a <sup>32</sup>P labeled probe (dashed rectangle) that hybridizes to the bacterial ampicillin resistance gene that is part of the DR construct. See Supplementary Table 10 for primers. **(b) Southern blots of *tDNA<sup>ala</sup>*HO inserted at DR locus in indicated strains.** 2D gels of a fragment containing *tDNA<sup>ala</sup>*HO in the direct repeat context; also see quantification in Supplementary Figure 1. 1N, non-replicating fragment; 2N, almost fully replicated fragment right before sister chromatids separate; P, replication pause.

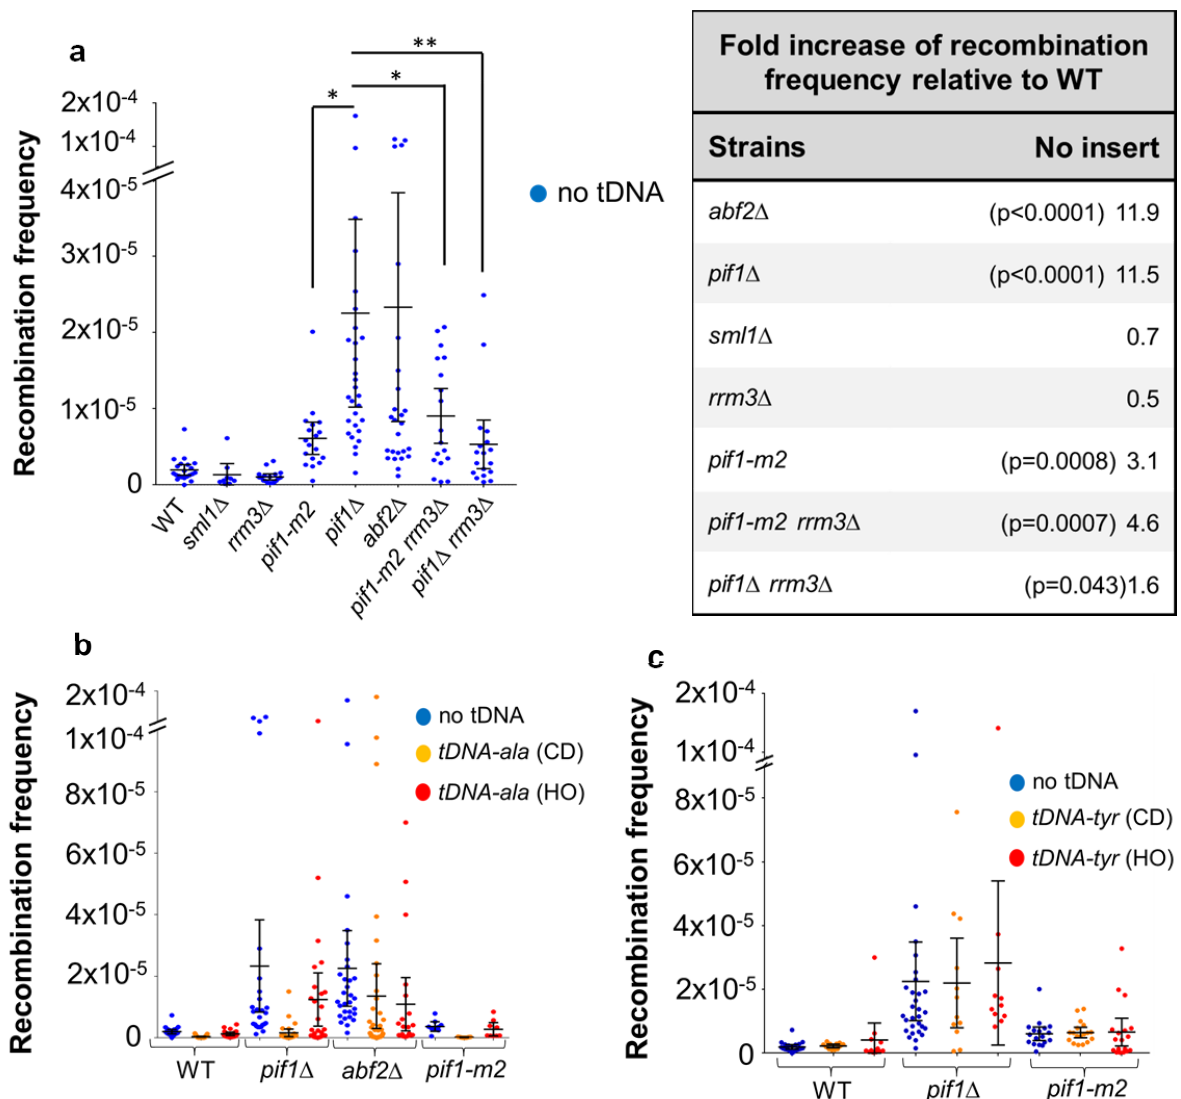

**Supplementary Figure 5: (a) Recombination frequency of WT and mutants without insert (left) and table of fold increase in recombination relative to WT (right).** *pif1Δ* cells exhibit a high and more variable recombination frequency that is likely due to defects in mitochondrial function, as it is also seen in mitochondrial deficient *abf2Δ* cells<sup>1</sup>. This interpretation is supported by the finding that these effects are not seen in *pif1-m2* cells, which are proficient in mitochondrial function<sup>2</sup> nor in *pif1Δ rrm3Δ* cells, where the respiratory defect of *pif1Δ* cells is largely suppressed<sup>3,4</sup> (see also Supplementary Figure 6). \* $p < 0.5$  and \*\* $p \leq 0.009$ . (b, c) **Recombination frequency of indicated strains in presence or absence of *tDNA*<sup>ala</sup> or *tDNA*<sup>tyr</sup> in HO or CD orientations.** There was no further increase in recombination in *pif1Δ*, *pif1-m2* or *abf2Δ* cells having *tDNA*<sup>ala</sup>HO or *tDNA*<sup>tyr</sup>HO in the test interval.

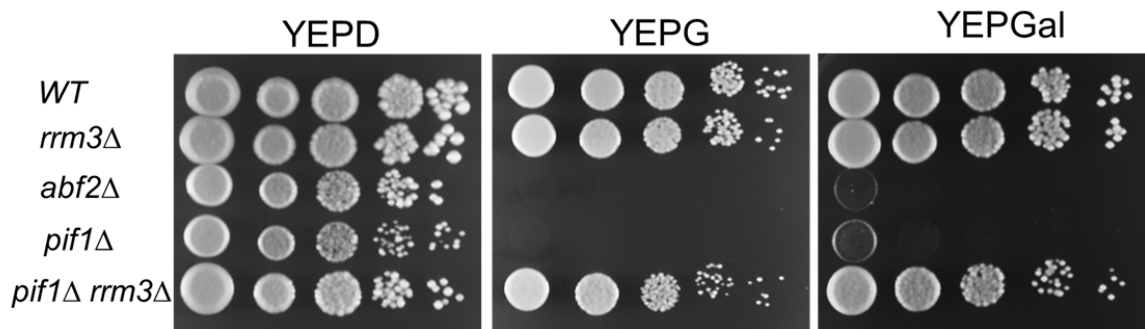

**Supplementary Figure 6: Growth of the indicated strains on YEPD (D for dextrose), YEPG (G for glycerol) and YEPGal (Gal for galactose).** Cells were grown overnight in liquid culture, diluted to  $OD_{660} = 1.4$ , and spotted onto YEPD, YEPG and YEPGal plates and grown for 3 days at 30°C. The experiment was done with three independent biological replicates for each genotype. Deletion of *ABF2* or *PIF1* results in a mitochondrial defect, causing death on YEPG and YEPGal. Deletion of *RRM3* in *pif1Δ* cells (*pif1Δ rrm3Δ*) partially rescues the mtDNA loss phenotype of *pif1Δ* cells, as described in<sup>3,4</sup>.

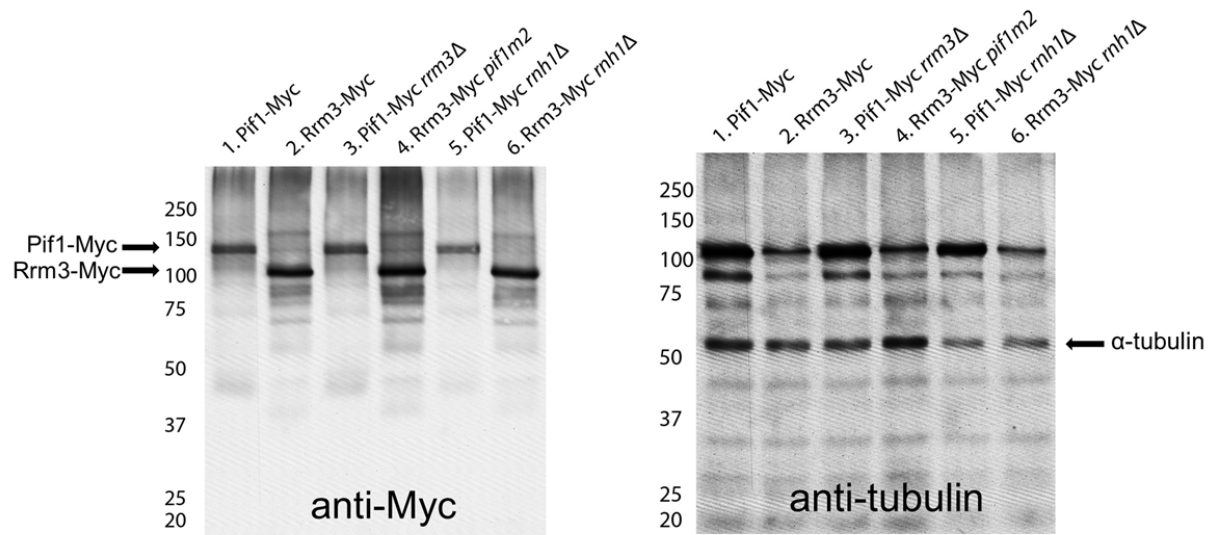

**Supplementary Figure 7: Full western blot of Pif1-Myc (113kDa) and Rrm3-Myc (97kDa) expression levels in WT, *rrm3* $\Delta$ , *pif1-m2* and *rh1* $\Delta$  cells (left). Full western-blot of  $\alpha$ -tubulin (50kDa) expression level in WT and mutants (right).**

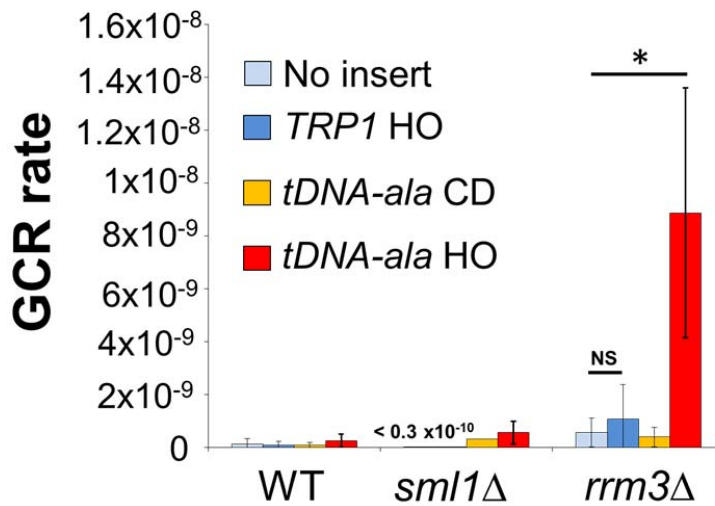

**Supplementary Figure 8: GCR rates with or without *tDNA<sup>ala</sup>* CD or HO inserts or with a transcribed non-tDNA, *TRP1* marker (in HO orientation) were calculated using FALCOR and MMS maximum likelihood method.** Means and standard deviations of GCR rates were obtained from at least three technical replicates per strain. The data show no significant increase of GCR rate with *TRP1* (HO) inserted compared to no insert in WT, *sml1*Δ and *rrm3*Δ cells. Therefore, low level transcription as occurs at *TRP1* is not sufficient to increase the GCR rate significantly.



**Supplementary Table 1: Mean GCR rate in indicated strains**

| Strains                                   | Mean of GCR rate ( $\times 10^{-10}$ ) |            |             |           |                             |            |                             |              |
|-------------------------------------------|----------------------------------------|------------|-------------|-----------|-----------------------------|------------|-----------------------------|--------------|
|                                           | No insert                              |            | <i>TRP1</i> |           | <i>tDNA<sup>ala</sup>CD</i> |            | <i>tDNA<sup>ala</sup>HO</i> |              |
| WT                                        | 1.46                                   | $\pm 2.01$ | 0.9         | $\pm 1.5$ | 1.02                        | $\pm 1.02$ | 2.58                        | $\pm 2.50$   |
| <i>sml1</i> $\Delta$                      | <0.3                                   | ND         | <0.2        | ND        | 3.20                        | ND         | 5.73                        | $\pm 4.27$   |
| <i>rrm3</i> $\Delta$                      | 5.80                                   | $\pm 5.45$ | 10.8        | $\pm 13$  | 4.03                        | $\pm 3.65$ | 88.70                       | $\pm 47.28$  |
| <i>rnh1</i> $\Delta$                      | 1.65                                   | $\pm 7.60$ | ND          | ND        | 10.16                       | $\pm 4.08$ | 139.94                      | $\pm 47.79$  |
| <i>rrm3</i> $\Delta$ <i>rnh1</i> $\Delta$ | 6.67                                   | $\pm 6.67$ | ND          | ND        | 12.37                       | $\pm 4.17$ | 339.96                      | $\pm 163.32$ |

Data are mean  $\pm$  standard deviation (s.d.) calculated from  $\geq 3$  independent experiments. ND, not determined.

**Supplementary Table 2: P values for data in Supplementary Table 1.**

| P-value                                            | <i>rrm3</i> $\Delta$ , <i>tDNA<sup>ala</sup>HO</i> |
|----------------------------------------------------|----------------------------------------------------|
| WT, <i>tDNA<sup>ala</sup>HO</i>                    | P = 0.009**                                        |
| <i>rrm3</i> $\Delta$                               | P = 0.025*                                         |
| <i>rrm3</i> $\Delta$ , <i>tDNA<sup>ala</sup>CD</i> | P = 0.011*                                         |

| P-value                                                                    | <i>rrm3</i> $\Delta$ <i>rnh1</i> $\Delta$ ,<br><i>tDNA<sup>ala</sup>HO</i> |
|----------------------------------------------------------------------------|----------------------------------------------------------------------------|
| WT, <i>tDNA<sup>ala</sup>HO</i>                                            | P = 0.002**                                                                |
| <i>rrm3</i> $\Delta$ , <i>tDNA<sup>ala</sup>HO</i>                         | P = 0.008**                                                                |
| <i>rnh1</i> $\Delta$ , <i>tDNA<sup>ala</sup>HO</i>                         | P = 0.02*                                                                  |
| <i>rrm3</i> $\Delta$ <i>rnh1</i> $\Delta$ ,<br><i>tDNA<sup>ala</sup>CD</i> | P = 0.002**                                                                |

P-values are from  $\geq 3$  independent experiments and calculated using two-tailed unpaired student's t-test.

\*P < 0.05 and \*\*P  $\leq$  0.009

**Supplementary Table 3: Mean GCR rate in indicated strains with or without Rnh1 overexpression**

| Strains                                             | Mean of GCR rate ( $\times 10^{-10}$ ) |             |                            |             |
|-----------------------------------------------------|----------------------------------------|-------------|----------------------------|-------------|
|                                                     | empty plasmid                          |             | <i>Rnh1</i> overexpression |             |
| WT                                                  | 1.35                                   | $\pm 0.65$  | 8.09                       | $\pm 5.79$  |
| WT, <i>tDNA<sup>ala</sup></i> HO                    | 20.23                                  | $\pm 13.59$ | 22.50                      | $\pm 12.70$ |
| <i>rrm3</i> $\Delta$                                | 68.80                                  | $\pm 19.30$ | 98.14                      | $\pm 54.14$ |
| <i>rrm3</i> $\Delta$ , <i>tDNA<sup>ala</sup></i> HO | 203.93                                 | $\pm 37.41$ | 100.23                     | $\pm 23.41$ |

Data are mean  $\pm$  s.d. calculated from  $\geq 3$  independent experiments

**Supplementary Table 4: P values for data in Supplementary Table 3**

| P-value              | <i>rrm3</i> $\Delta$ , <i>tDNA<sup>ala</sup></i> HO |                            |
|----------------------|-----------------------------------------------------|----------------------------|
|                      | empty plasmid                                       | <i>Rnh1</i> overexpression |
| WT                   | P = 0.001**                                         | P = 0.058                  |
| <i>rrm3</i> $\Delta$ | P = 0.017*                                          | P = 0.43                   |

P-values are from  $\geq 3$  independent experiments and calculated using two-tailed unpaired student's t-test.

\*P < 0.03 and \*\*P  $\leq$  0.009

**Supplementary Table 5: DR recombination frequency in indicated strains**

| Strains                                   | Mean of recombination frequency ( $\times 10^{-6}$ ) |            |                             |            |                             |            |                             |             |                             |             |
|-------------------------------------------|------------------------------------------------------|------------|-----------------------------|------------|-----------------------------|------------|-----------------------------|-------------|-----------------------------|-------------|
|                                           | No insert                                            |            | <i>tDNA<sup>ala</sup>CD</i> |            | <i>tDNA<sup>ala</sup>HO</i> |            | <i>tDNA<sup>tyr</sup>CD</i> |             | <i>tDNA<sup>tyr</sup>HO</i> |             |
| WT                                        | 1.96                                                 | $\pm 1.54$ | 0.31                        | $\pm 0.41$ | 1.24                        | $\pm 1.17$ | 2.27                        | $\pm 0.92$  | 4.14                        | $\pm 8.36$  |
| <i>abf2</i> $\Delta$                      | 23.32                                                | $\pm 37.2$ | 2.04                        | $\pm 3.73$ | 12.40                       | $\pm 21.9$ | ND                          | ND          | ND                          | ND          |
| <i>pif1</i> $\Delta$                      | 22.53                                                | $\pm 33.0$ | 13.5                        | $\pm 33.8$ | 10.90                       | $\pm 19.0$ | 22.03                       | $\pm 22.08$ | 28.29                       | $\pm 38.29$ |
| <i>sml1</i> $\Delta$                      | 1.33                                                 | $\pm 1.91$ | 0.10                        | $\pm 0.14$ | 0.41                        | $\pm 0.19$ | ND                          | ND          | ND                          | ND          |
| <i>rrm3</i> $\Delta$                      | 1.05                                                 | $\pm 0.79$ | 1.12                        | $\pm 1.19$ | 2.00                        | $\pm 2.48$ | 2.61                        | $\pm 2.95$  | 3.41                        | $\pm 2.75$  |
| <i>pif1-m2</i>                            | 6.10                                                 | $\pm 4.26$ | 0.28                        | $\pm 0.29$ | 4.66                        | $\pm 3.40$ | 6.50                        | $\pm 3.30$  | 6.632                       | $\pm 8.70$  |
| <i>pif1-m2 rrm3</i> $\Delta$              | 9.03                                                 | $\pm 7.22$ | 7.04                        | $\pm 4.91$ | 22.5                        | $\pm 7.92$ | 13.0                        | $\pm 7.19$  | 53.35                       | $\pm 34.5$  |
| <i>pif1</i> $\Delta$ <i>rrm3</i> $\Delta$ | 3.15                                                 | $\pm 2.68$ | 2.85                        | $\pm 1.92$ | 11.30                       | $\pm 5.13$ | 28.14                       | $\pm 11.48$ | 165.7                       | $\pm 59.94$ |

Data are mean  $\pm$  s.d. calculated from  $\geq 3$  independent experiments of 3 different biological isolates. ND stands for not determined.

**Supplementary Table 6: P-values for data in Supplementary Table 5.**

| P-value                                                        | <i>pif1-m2 rrm3</i> $\Delta$ ,<br><i>tDNA<sup>ala</sup>HO</i> | <i>pif1-m2 rrm3</i> $\Delta$ ,<br><i>tDNA<sup>tyr</sup>HO</i> |
|----------------------------------------------------------------|---------------------------------------------------------------|---------------------------------------------------------------|
| WT, <i>tDNA<sup>ala/tyr</sup>HO</i>                            | P < 0.0001****                                                | P < 0.0001****                                                |
| <i>rrm3</i> $\Delta$ , <i>tDNA<sup>ala/tyr</sup>HO</i>         | P < 0.0001****                                                | P < 0.0001****                                                |
| <i>pif1-m2</i> , <i>tDNA<sup>ala/tyr</sup>HO</i>               | P < 0.0001****                                                | P < 0.0001****                                                |
| <i>pif1-m2 rrm3</i> $\Delta$                                   | P < 0.0001****                                                | P < 0.0001****                                                |
| <i>pif1-m2 rrm3</i> $\Delta$ , <i>tDNA<sup>ala/tyr</sup>CD</i> | P < 0.0001****                                                | P = 0.0001***                                                 |

| P-value                                                                     | <i>pif1</i> $\Delta$ <i>rrm3</i> $\Delta$ ,<br><i>tDNA<sup>ala</sup>HO</i> | <i>pif1</i> $\Delta$ <i>rrm3</i> $\Delta$ ,<br><i>tDNA<sup>tyr</sup>HO</i> |
|-----------------------------------------------------------------------------|----------------------------------------------------------------------------|----------------------------------------------------------------------------|
| WT, <i>tDNA<sup>ala/tyr</sup>HO</i>                                         | P < 0.0001****                                                             | P = 0.024*                                                                 |
| <i>rrm3</i> $\Delta$ , <i>tDNA<sup>ala/tyr</sup>HO</i>                      | P < 0.0001****                                                             | P = 0.005**                                                                |
| <i>pif1-m2</i> , <i>tDNA<sup>ala/tyr</sup>HO</i>                            | P < 0.0001****                                                             | P = 0.006**                                                                |
| <i>pif1</i> $\Delta$ <i>rrm3</i> $\Delta$                                   | P < 0.0001****                                                             | P = 0.006**                                                                |
| <i>pif1</i> $\Delta$ <i>rrm3</i> $\Delta$ , <i>tDNA<sup>ala/tyr</sup>CD</i> | P < 0.0001****                                                             | P = 0.019*                                                                 |

P-values are from  $\geq 3$  independent experiments and calculated using two-tailed unpaired student's t-test.

\*P < 0.05, \*\*P  $\leq$  0.009, \*\*\*P  $\leq$  0.0009 and \*\*\*\*P < 0.0001

**Supplementary Table 7: DR recombination frequency in indicated strains with or without Rnh1 overexpression**

| Strains                                                      | Mean of recombination frequency ( $\times 10^{-6}$ ) |              |                            |             |
|--------------------------------------------------------------|------------------------------------------------------|--------------|----------------------------|-------------|
|                                                              | empty plasmid                                        |              | <i>Rnh1</i> overexpression |             |
| WT                                                           | 8.75                                                 | $\pm 4.75$   | 7.82                       | $\pm 8.11$  |
| <i>pif1-m2 rrm3<math>\Delta</math></i>                       | 7.13                                                 | $\pm 5.97$   | 11.23                      | $\pm 13.09$ |
| <i>pif1-m2 rrm3<math>\Delta</math>, tDNA<sup>tyr</sup>HO</i> | 213.10                                               | $\pm 117.37$ | 39.03                      | $\pm 29.13$ |

Data are mean  $\pm$  standard deviation (s.d.) calculated from  $\geq 3$  independent experiments of 3 different biological isolates.

**Supplementary Table 8: P-values for data in Supplementary Table 7**

| P-value                                | <i>pif1-m2 rrm3<math>\Delta</math>, tDNA<sup>tyr</sup>HO</i> |                            |
|----------------------------------------|--------------------------------------------------------------|----------------------------|
|                                        | empty plasmid                                                | <i>Rnh1</i> overexpression |
| WT                                     | P = 0.002**                                                  | P = 0.0005***              |
| <i>pif1-m2 rrm3<math>\Delta</math></i> | P = 0.002**                                                  | P = 0.001**                |

| P-value                                                                                   | <i>pif1-m2 rrm3<math>\Delta</math>, tDNA<sup>tyr</sup>HO</i><br>empty plasmid |
|-------------------------------------------------------------------------------------------|-------------------------------------------------------------------------------|
| <i>pif1-m2 rrm3<math>\Delta</math> tDNA<sup>tyr</sup>HO</i><br><i>Rnh1</i> overexpression | P = 0.002**                                                                   |

\*\*P  $\leq$  0.009 and \*\*\*P  $\leq$  0.0009

**Supplementary Table 9: Yeast strains and ChIP-qPCR primers**

| Strain | Genotype                                                         | Reference or source                            |
|--------|------------------------------------------------------------------|------------------------------------------------|
| YPH499 | <i>MATa ura3-52 lys2-801 ade2-101 trp1-Δ63 his1-Δ200 leu2-Δ1</i> | Lab stock                                      |
| YCF101 | YPH499 <i>PIF1-MYC13::TRP1</i>                                   | Paeschke et al., Cell, 2011 <sup>5</sup>       |
| YCF103 | YPH499 <i>RRM3-MYC13::TRP1</i>                                   | Azvolinsky et al., Gene Dev, 2006 <sup>6</sup> |
| YCF104 | YPH499 <i>PIF1-MYC13::TRP1 bar1Δ::NAT</i>                        | This study                                     |
| YCF105 | YPH499 <i>RRM3-MYC13::TRP1 bar1Δ::NAT</i>                        | This study                                     |
| YCF106 | YPH499 <i>PIF1-MYC13::TRP1 bar1Δ::NAT rrm3Δ::HIS3</i>            | This study                                     |
| YCF107 | YPH499 <i>RRM3-MYC13::TRP1 bar1Δ::NAT pif1-m2::HPH</i>           | This study                                     |
| YCF108 | YPH499 <i>PIF1-MYC13::TRP1 bar1Δ::NAT rnh1Δ::HPH</i>             | This study                                     |
| YCF109 | YPH499 <i>RRM3-MYC13::TRP1 bar1Δ::NAT rnh1Δ::HPH</i>             | This study                                     |

| Primer name                             | Primer sequence               |
|-----------------------------------------|-------------------------------|
| <i>tDNA-ala - tA(AGC)F - ChVI, For</i>  | GGGAAAGATTGTACGGGAAATG        |
| <i>tDNA-ala - tA(AGC)F - ChVI, Rev</i>  | ACCTGTATCATTCTCTGTTTGAAG      |
| <i>tDNA-tyr - tY(GUA)F1 - ChVI, For</i> | CCTCTGCGTCTCATTGGAAGAAG       |
| <i>tDNA-tyr - tY(GUA)F1 - ChVI, Rev</i> | GACCAACCAAATCAATAATAAAATTCGGC |
| <i>tDNA-gly - ChX, For</i>              | CTGTACACATAATTGACACGTTTAAAC   |
| <i>tDNA-gly - ChX, Rev</i>              | ACTTCGTCCCAATCCTTTATTCC       |
| <i>YBL028C - ChII, For</i>              | TCTCGTCGACATCCATGTCAATTCC     |
| <i>YBL028C - ChII, Rev</i>              | GACACTGATGACAAACCAAGAGTTCA    |

**Supplementary Table 10: Primers used for 2D gel probes**

| Primer name                     | tDNA      | Primer sequence           |
|---------------------------------|-----------|---------------------------|
| DR 2D (tDNA_alanine in DR), For | tA(AGC)F  | TGGCGTTTTTCCATAGGCT       |
| DR 2D (tDNA_alanine in DR), Rev | tA(AGC)F  | TGTCGCCCTTATTCCCTTTT      |
| AGC/F (tDNA-ala native)         | tA(AGC)F  | TGCACTCACACCATTACACT      |
| AGC/R (tDNA-ala native)         | tA(AGC)F  | ATTGGCCCAAAGGGATCAT       |
| GUA/F (tDNA-tyr native)         | tY(GUA)F1 | CTTTTTCTGGCTTTATGATATGTTG |
| GUA/R (tDNA-tyr native)         | tY(GUA)F1 | ATTTGGTTGTTGTAGTTGATATTGG |
| tRNA (gly) tG(GCC)J2 F          | tG(GCC)J2 | AAACCGACCAAAAAGAGGTG      |
| tRNA (gly) tG(GCC)J2 R          | tG(GCC)J2 | AACGTAAGTCCAGGCCTCATT     |
| rDNA 2D F (RFB)                 |           | AGCCTGCTATGGTTCAGCGA      |
| rDNA 2D R (RFB)                 |           | TTTATCCGGAGATGGGGTCTT     |

**Supplementary Table 11: Yeast strains and plasmids used in GCR assays**

| Strain name          | Gene(s) of interest | Insert                       | Reference or source |
|----------------------|---------------------|------------------------------|---------------------|
| TTY 156              | WT                  | no insert                    | This study          |
| *TTY164 / 165        | WT                  | <i>TRP1</i> HO               | This study          |
| TTY 170              | WT                  | <i>tDNA<sup>ala</sup></i> CD | This study          |
| TTY 171              | WT                  | <i>tDNA<sup>ala</sup></i> HO | This study          |
| *TTY 168 / 169       | <i>sml1Δ</i>        | no insert                    | This study          |
| *TTY 188 /189        | <i>sml1Δ</i>        | <i>TRP1</i> HO               | This study          |
| *TTY 677 / 678       | <i>sml1Δ</i>        | <i>tDNA<sup>ala</sup></i> CD | This study          |
| *TTY 196 / 197       | <i>sml1Δ</i>        | <i>tDNA<sup>ala</sup></i> HO | This study          |
| *TTY 316 / 317       | <i>rrm3Δ</i>        | no insert                    | This study          |
| *TTY 184 /185        | <i>rrm3Δ</i>        | <i>TRP1</i> HO               | This study          |
| *TTY 681 / 682       | <i>rrm3Δ</i>        | <i>tDNA<sup>ala</sup></i> CD | This study          |
| *TTY 194 / 320 / 321 | <i>rrm3Δ</i>        | <i>tDNA<sup>ala</sup></i> HO | This study          |
| TTY 331              | <i>rnh1Δ</i>        | no insert                    | This study          |
| TTY 338 / 339        | <i>rnh1Δ</i>        | <i>tDNA<sup>ala</sup></i> CD | This study          |
| *TTY 441 / 442 / 443 | <i>rnh1Δ</i>        | <i>tDNA<sup>ala</sup></i> HO | This study          |
| *TTY 410 / 411       | <i>rrm3Δ rnh1Δ</i>  | no insert                    | This study          |
| *TTY 444 / 445 / 446 | <i>rrm3Δ rnh1Δ</i>  | <i>tDNA<sup>ala</sup></i> CD | This study          |
| *TTY 340 / 412 / 414 | <i>rrm3Δ rnh1Δ</i>  | <i>tDNA<sup>ala</sup></i> HO | This study          |

\*Different biological isolates were tested for each genotype. All strains are in YPH background.

| Plasmid name                    | Gene(s) of interest                                             | Reference or source |
|---------------------------------|-----------------------------------------------------------------|---------------------|
| TTB39 or pGALS-424              | <i>GAL1, TRP1</i> (empty vector)                                | Lab stock           |
| TTB40 or pGALS-424- <i>RNH1</i> | <i>GAL1, TRP1, RNH1</i><br>( <i>RNH1</i> overexpression vector) | This study          |

**Supplementary Table 12: Yeast strains and plasmids used in DR assay and 2D gels**

| Strain name               | Gene(s) of interest    | Insert                      | Reference or source                         |
|---------------------------|------------------------|-----------------------------|---------------------------------------------|
| yBL3100                   | ChrVI-Ade <sup>+</sup> | --                          | Brian Lenzmeier <sup>1</sup><br>(lab stock) |
| TTY 533 / 534 / 535       | WT                     | no insert                   | This study                                  |
| TTY 232 / 233 / 234       | WT                     | <i>tDNA<sup>ala</sup>CD</i> | This study                                  |
| TTY 536 / 537 / 538       | WT                     | <i>tDNA<sup>ala</sup>HO</i> | This study                                  |
| TTY 575 / 576 / 577       | <i>abf2Δ</i>           | no insert                   | This study                                  |
| TTY 539 / 540 / 541       | <i>abf2Δ</i>           | <i>tDNA<sup>ala</sup>CD</i> | This study                                  |
| TTY 565 / 566 / 567       | <i>abf2Δ</i>           | <i>tDNA<sup>ala</sup>HO</i> | This study                                  |
| TTY 582 / 583 / 584       | <i>pif1Δ</i>           | no insert                   | This study                                  |
| TTY 530 / 531 / 532       | <i>pif1Δ</i>           | <i>tDNA<sup>ala</sup>CD</i> | This study                                  |
| TTY 527 / 528 / 529       | <i>pif1Δ</i>           | <i>tDNA<sup>ala</sup>HO</i> | This study                                  |
| TTY 572 / 573 / 574       | <i>sml1Δ</i>           | no insert                   | This study                                  |
| TTY 585 / 586 / 587       | <i>sml1Δ</i>           | <i>tDNA<sup>ala</sup>CD</i> | This study                                  |
| TTY 568 / 569 / 570 / 571 | <i>sml1Δ</i>           | <i>tDNA<sup>ala</sup>HO</i> | This study                                  |
| TTY 612 / 613 / 614 / 635 | <i>rrm3Δ</i>           | no insert                   | This study                                  |
| TTY 304 / 305 / 306 / 307 | <i>rrm3Δ</i>           | <i>tDNA<sup>ala</sup>CD</i> | This study                                  |
| TTY 556 / 557 / 558       | <i>rrm3Δ</i>           | <i>tDNA<sup>ala</sup>HO</i> | This study                                  |
| TTY 597 / 672 / 673 / 674 | <i>pif1Δ rrm3Δ</i>     | no insert                   | This study                                  |
| TTY 598 / 599 / 600       | <i>pif1Δ rrm3Δ</i>     | <i>tDNA<sup>ala</sup>CD</i> | This study                                  |
| TTY 594 / 595 / 596       | <i>pif1Δ rrm3Δ</i>     | <i>tDNA<sup>ala</sup>HO</i> | This study                                  |
| TTY 715 / 716 / 717       | <i>pif1-m2</i>         | no insert                   | This study                                  |
| TTY 718 / 719 / 720       | <i>pif1-m2</i>         | <i>tDNA<sup>ala</sup>CD</i> | This study                                  |
| TTY 722 / 723 / 724       | <i>pif1-m2</i>         | <i>tDNA<sup>ala</sup>HO</i> | This study                                  |
| TTY 736 / 737             | <i>pif1-m2 rrm3Δ</i>   | no insert                   | This study                                  |
| TTY 739 / 740 / 741       | <i>pif1-m2 rrm3Δ</i>   | <i>tDNA<sup>ala</sup>CD</i> | This study                                  |
| TTY 743 / 744 / 745       | <i>pif1-m2 rrm3Δ</i>   | <i>tDNA<sup>ala</sup>HO</i> | This study                                  |
| yBL68                     | WT                     | <i>tDNA<sup>tyr</sup>CD</i> | Brian Lenzmeier <sup>1</sup><br>(lab stock) |
| yBL136                    | WT                     | <i>tDNA<sup>tyr</sup>HO</i> |                                             |
| TTY 657 / 658 / 659 / 660 | <i>pif1Δ</i>           | <i>tDNA<sup>tyr</sup>CD</i> | This study                                  |
| TTY 661 / 662 / 663 / 664 | <i>pif1Δ</i>           | <i>tDNA<sup>tyr</sup>HO</i> | This study                                  |
| TTY 665 / 666 / 667       | <i>rrm3Δ</i>           | <i>tDNA<sup>tyr</sup>CD</i> | This study                                  |
| TTY 668 / 669 / 670       | <i>rrm3Δ</i>           | <i>tDNA<sup>tyr</sup>HO</i> | This study                                  |
| TTY 703 / 704 / 705       | <i>pif1Δ rrm3Δ</i>     | <i>tDNA<sup>tyr</sup>CD</i> | This study                                  |
| TTY 687 / 688 / 700 / 701 | <i>pif1Δ rrm3Δ</i>     | <i>tDNA<sup>tyr</sup>HO</i> | This study                                  |
| TTY 724 / 727 / 728       | <i>pif1-m2</i>         | <i>tDNA<sup>tyr</sup>CD</i> | This study                                  |
| TTY 730 / 731 / 732       | <i>pif1-m2</i>         | <i>tDNA<sup>tyr</sup>HO</i> | This study                                  |
| TTY 746 / 748 / 749       | <i>pif1-m2 rrm3Δ</i>   | <i>tDNA<sup>tyr</sup>CD</i> | This study                                  |
| TTY 750 / 751 / 752       | <i>pif1-m2 rrm3Δ</i>   | <i>tDNA<sup>tyr</sup>HO</i> | This study                                  |

Three different biological isolates were tested for each genotype. All strains are in YPH background.

| Plasmid name | Gene(s) of interest                    | Reference or source                         |
|--------------|----------------------------------------|---------------------------------------------|
| pA2-DRIVB    | <i>URA3</i> , partial <i>ade2</i>      | Brian Lenzmeier <sup>1</sup><br>(lab stock) |
| TTB48        | pA2-DRIVB, <i>tDNA<sup>ala</sup>CD</i> | This study                                  |
| TTB65        | pA2-DRIVB, <i>tDNA<sup>ala</sup>HO</i> | This study                                  |
| TTB50        | pA2-DRIVB without inserted region      | This study                                  |

## References for Supplementary Info

1. Cho, J.H., Ha, S.J., Kao, L.R., Megraw, T.L. & Chae, C.B. A novel DNA-binding protein bound to the mitochondrial inner membrane restores the null mutation of mitochondrial histone Abf2p in *Saccharomyces cerevisiae*. *Molecular and Cellular Biology* **18**, 5712-23 (1998).
2. Schulz, V.P. & Zakian, V.A. The *Saccharomyces* PIF1 DNA helicase inhibits telomere elongation and de novo telomere formation. *Cell* **76**, 145-55 (1994).
3. Cheng, X., Qin, Y. & Ivessa, A.S. Loss of mitochondrial DNA under genotoxic stress conditions in the absence of the yeast DNA helicase Pif1p occurs independently of the DNA helicase Rrm3p. *Mol Genet Genomics* **281**, 635-45 (2009).
4. O'Rourke, T.W. et al. Differential involvement of the related DNA helicases Pif1p and Rrm3p in mtDNA point mutagenesis and stability. *Gene* **354**, 86-92 (2005).
5. Paeschke, K., Capra, J.A. & Zakian, V.A. DNA replication through G-quadruplex motifs is promoted by the *Saccharomyces cerevisiae* Pif1 DNA helicase. *Cell* **145**, 678-91 (2011).
6. Azvolinsky, A., Dunaway, S., Torres, J.Z., Bessler, J.B. & Zakian, V.A. The *S. cerevisiae* Rrm3p DNA helicase moves with the replication fork and affects replication of all yeast chromosomes. *Genes Dev* **20**, 3104-16 (2006).
7. Freudenreich, C.H., Kantrow, S.M. & Zakian, V.A. Expansion and length-dependent fragility of CTG repeats in yeast. *Science* **279**, 853-6 (1998).
